# Supplementary figures and images for: Palmitic Acid Regulation of Stem Browning in Freshly Harvested Mini-Chinese Cabbage (Brassica pekinensis (Lour.) Rupr.)
Source: MDPI journal article supplement (doi:10.3390/foods12051105), 2023-03-05

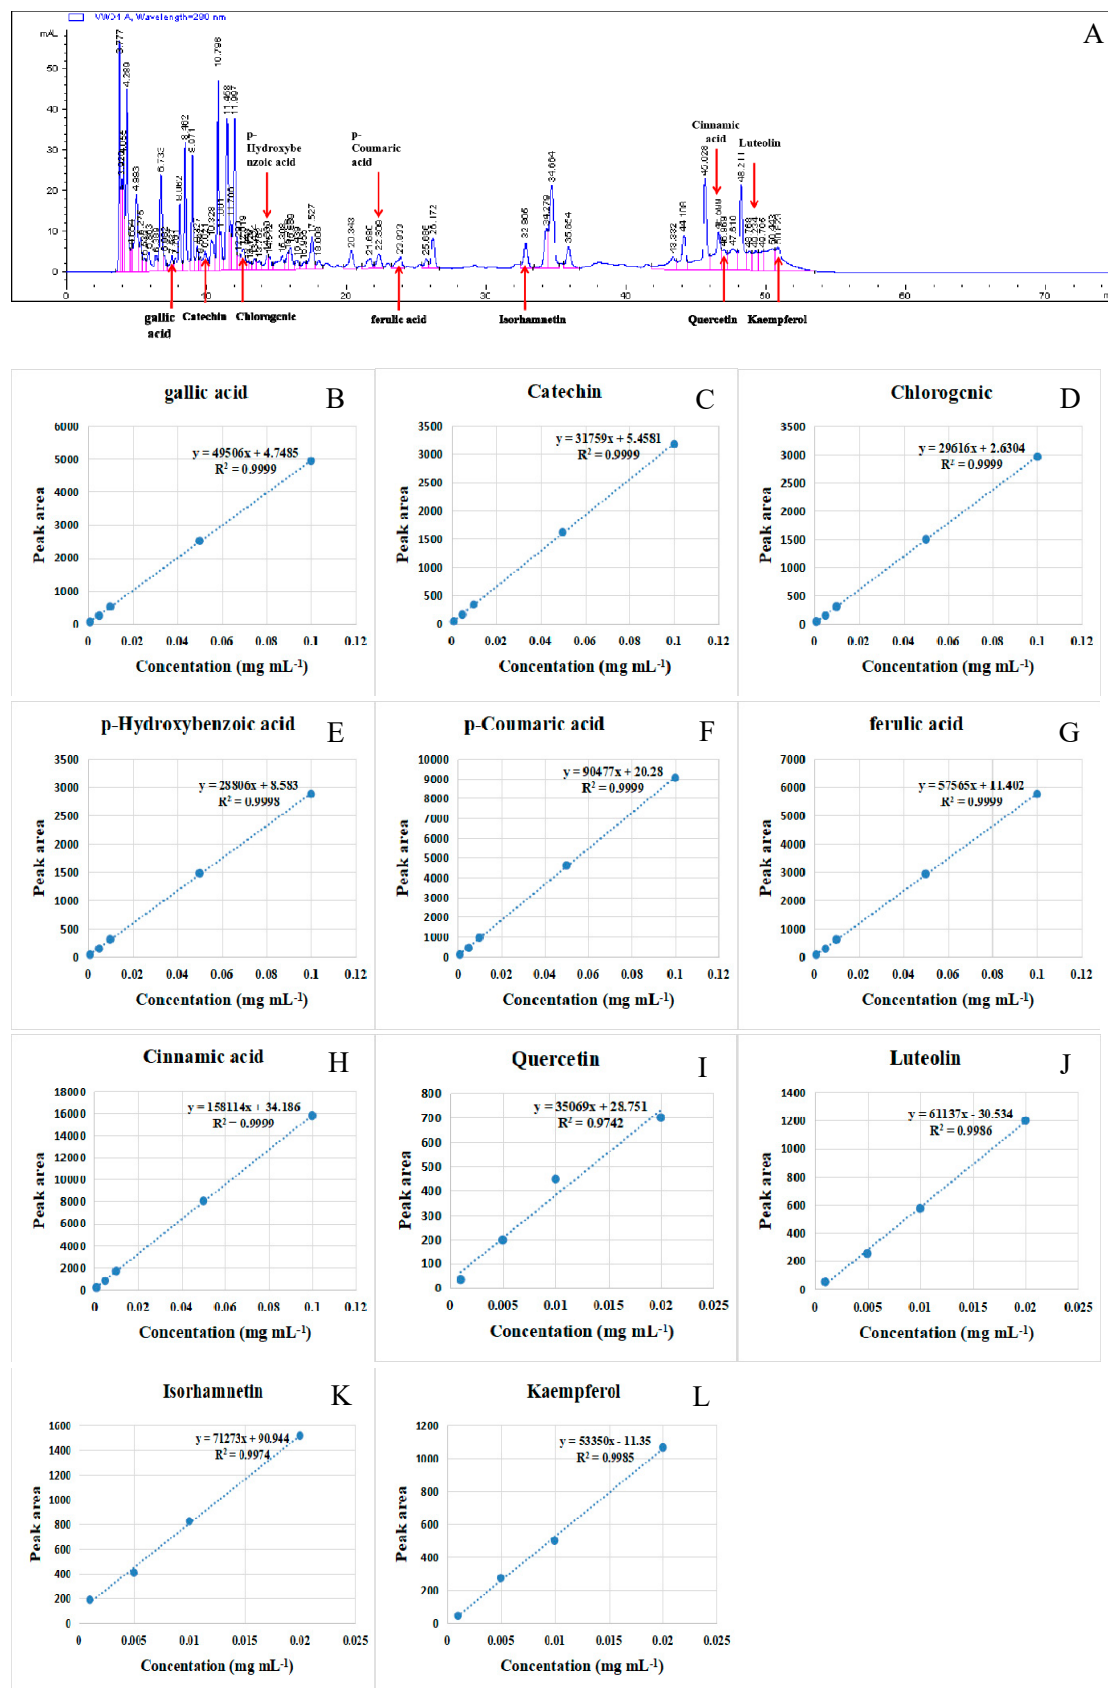

Supplement: s1 [file s1]
